# Supplementary material for: Variations in policies for accessing elective musculoskeletal procedures in the English National Health Service: A documentary analysis
Source: J Health Serv Res Policy. 2022 May 15;27(3):190–202. doi: 10.1177/13558196221091518 (PMC9277328; doi:10.1177/13558196221091518)
Supplement: Supplemental Material - Variations in policies for accessing elective musculoskeletal procedures in the English National Health Service: A documentary analysis [file sj-xlsx-5-hsr-10.1177_13558196221091518.xlsx]

## Sheet: Sheet1
Journal of Health Services Research & Policy Variations in policies for accessing elective musculoskeletal procedures in the English National Health Service: A documentary analysis Leila Rooshenas, Sharea Ijaz, Alison Richards, Alba Realpe, Jelena Savovic, Tim Jones, William Hollingworth and Jenny Donovan
Explanation of Online Supplement S5
The following tabs show the reference lists for each region's policy, for each procedure. Blank columns indicate that no references were included in the policy. Similar references have been shown in the same rows, to visually represent similarities/differences in reference lists. The text presented in these files are verbatim (from the policies), and have not been corrected for publication purpos…
References have been colour-coded in the following cateogries:
RCT
Systematic review
National guidance

## Sheet: Subacromial decompression
Commissioning body	Region-1	Region-11	Region-12	Region-2
Date of last review	11 July 2019	June 2017	01 August 2019	08 March 2018
	Royal College of Surgeons. (n.d.). Commissioning guide: Subacromial Shoulder Pain. Retrieved 05 21, 2016, from http://www.rcseng.ac.uk/healthcare-bodies/docs/commissioning-guidesboa/subacromial-shoulder-pain-commissioning-guide.		Commissioning Guide 2014: Subacromial Shoulder Pain, British Elbow & Shoulder Society (BESS), British Orthopaedic Association (BOA), Royal College of Surgeons for England (RCSEng), Publication date: MMM 2014
			Exercises versus arthroscopic decompression in patients with subacromial impingement: a randomised, controlled study in 90 cases with a one year follow up, J P Haahr et al, Ann Rheum Dis 2005;64:760–764. doi: 10.1136/ard.2004.021188	5. Haahr J P, Ostergaard S, Dalsgaard J, et al. Exercises versus arthroscopic decompression in patients with subacromial impingement: a randomised, controlled study in 90 cases with a one year follow up. Annals of the rheumatic diseases. May 2005;64(5):760-764.
			Arthroscopic surgery compared with supervised exercises in patients with rotator cuff disease (stage II impingement syndrome), J I Brox et al. BMJ. 1993 Oct 9; 307(6909): 899–903.	6. Brox J I, Staff P H, Ljunggren A E, Brevik J I. Arthroscopic surgery compared with supervised exercises in patients with rotator cuff disease (stage II impingement syndrome). BMJ. Oct 9 1993;307(6909):899-903.
		1. Coghlan JA, Buchbinder R, Green S, Johnston RV, Bell SN, Surgery for rotator cuff disease, Cochrane Database of Systematic Reviews 2008, Issue 1. Art. No.: CD005619. DOI: 10.1002/14651858.CD005619.pub2
		2. NICE CKS revised April 2015 accessed online via https://cks.nice.org.uk/shoulderpain
		3. Woo Hyung Lee et al, Clinical Outcomes of Conservative Treatment and Arthroscopic Repair of Rotator Cuff Tears: A Retrospective Observational Study, Ann Rehabil Med 2016;40(2):252-262 pISSN: 2234-0645 eISSN: 2234-0653 http://dx.doi.org/10.5535/arm.2016.40.2.252
		4. Baums et. al. Functional outcome and general health status in patients after arthroscopic release in adhesive capsulitis. Knee Surg Sports Traumatol Arthrosc. 2007 May; 15(5):638- 44.
		5. Snow M, Boutros I, Funk L. Posterior arthroscopic capsular release in frozen shoulder. Arthroscopy. 2009 Jan; 25(1):19-23.
		6. Fernandes MR. Arthroscopic treatment of adhesive capsulitis of the shoulder with minimum follow up of six years. Acta Ortop Bras. 2015 Mar-Apr; 23(2): 85–89. doi: 10.1590/1413- 78522015230200613 PMCID: PMC4813413
		7. Wei Dong et. al. Treatments for Shoulder Impingement Syndrome. A PRISMA Systematic Review and Network Meta-Analysis, Medicine, Volume 94, Number 10, March 2015
		8. Bhatnagar A1, Bhonsle S2, Mehta S1. Correlation between MRI and Arthroscopy in Diagnosis of Shoulder Pathology. J Clin Diagn Res. 2016 Feb; 10(2):RC18-21 https://www.ncbi.nlm.nih.gov/pmc/articles/PMC4800609/
		9. Frozen Shoulder - Amar Rangan, Lorna Goodchild, Jo Gibson, Peter Brownson, Michael Thomas, Jonathan Rees, and Ro Kulkarni https://www.ncbi.nlm.nih.gov/pmc/articles/PMC4935124/ 10. http://www.isrctn.com/ISRCTN48804508
			Effectiveness of conservative interventions including exercise, manual therapy and medical management in adults with shoulder impingement: a systematic review and meta-analysis of RCTs, Steuri R et al., Br J Sports Med. 2017 Sep;51(18):1340-1347. doi: 10.1136/bjsports-2016-096515. Epub 2017 Jun 19.
			Does arthroscopic acromioplasty provide any additional value in the treatment of shoulder impingement syndrome? A two-year randomised controlled trial, S. Ketola et al, J Bone Joint Surg [Br] 2009;91-B:1326-34. doi: 10.1302/0301-620X.91B10.22094.
			Cochrane Database of Systematic Reviews 2016: Manual therapy and exercise for rotator cuff disease, Page MJ, Green S, McBain B, Surace SJ, Deitch J, Lyttle N, Mrocki MA, Buchbinder R. (Published: 10 June 2016)
				1. Moosmayer S, Lund G, Seljom U, et al. Comparison between surgery and physiotherapy in the treatment of small and medium-sized tears of the rotator cuff: A randomised controlled study of 103 patients with one-year follow-up. The Journal of bone and joint surgery. British volume. Jan 2010;92(1):83-91.
				2. Moosmayer S, Lund G, Seljom U S, et al. Tendon repair compared with physiotherapy in the treatment of rotator cuff tears: a randomized controlled study in 103 cases with a five-year follow-up. The Journal of bone and joint surgery. American volume. Sep 17 2014;96(18):1504-1514.
				3. Kukkonen J, Joukainen A, Lehtinen J, et al. Treatment of non-traumatic rotator cuff tears: A randomised controlled trial with one-year clinical results. The bone & joint journal. Jan 2014;96-B(1):75-81.
				4. Rahme H, Solem-Bertoft E, Westerberg C E, Lundberg E, Sorensen S, Hilding S. The subacromial impingement syndrome. A study of results of treatment with special emphasis on predictive factors and paingenerating mechanisms. Scandinavian journal of rehabilitation medicine. Dec 1998;30(4):253-262.
				7. de Witte P B, Selten J W, Navas A, et al. Calcific tendinitis of the rotator cuff: a randomized controlled trial of ultrasound-guided needling and lavage versus subacromial corticosteroids. The American journal of sports medicine. Jul 2013;41(7):1665-1673.
				8. Gupta A K, Chalmers P N, Klosterman E L, et al. Subpectoral biceps tenodesis for bicipital tendonitis with SLAP tear. Orthopedics. Jan 2015;38(1):e48-53.
				9. Taylor S A, Fabricant P D, Baret N J, et al. Midterm clinical outcomes for arthroscopic subdeltoid transfer of the long head of the biceps tendon to the conjoint tendon. Arthroscopy : the journal of arthroscopic & related surgery : official publication of the Arthroscopy Association of North America and the International Arthroscopy Association. Dec 2014;30(12):1574-1581.
				10. Kelly A M, Drakos M C, Fealy S, Taylor S A, O'Brien S J. Arthroscopic release of the long head of the biceps tendon: functional outcome and clinical results. The American journal of sports medicine. Feb 2005;33(2):208213.
				11. Tokish JM, McBratney CM, Solomon DJ, Leclere L, Dewing CB, Provencher MT. Arthroscopic repair of circumferential lesions of the glenoid labrum: surgical technique. The Journal of bone and joint surgery. American volume. Sep 2010;92 Suppl 1 Pt 2:130-144.
				12. Smitherman J A, Struk A M, Cricchio M, et al. Arthroscopy and manipulation versus home therapy program in treatment of adhesive capsulitis of the shoulder: a prospective randomized study. Journal of surgical orthopaedic advances. Spring 2015;24(1):69-74.
				13. National Institute for Health and Care Excellence. NICE clinical guidance 177. Osteoarthritis: care and management in adults. 2014.
				14. Handoll H H, Almaiyah M A, Rangan A. Surgical versus non-surgical treatment for acute anterior shoulder dislocation. The Cochrane database of systematic reviews. 2004(1):CD00432\a5.
				15. Jakobsen B W, Johannsen H V, Suder P, Sojbjerg J O. Primary repair versus conservative treatment of firsttime traumatic anterior dislocation of the shoulder: a randomized study with 10-year follow-up. Arthroscopy : the journal of arthroscopic & related surgery : official publication of the Arthroscopy Association of North America and the International Arthroscopy Association. Feb 2007;23(2):1…
				16. Warby S A, Pizzari T, Ford J J, Hahne A J, Watson L. The effect of exercise-based management for multidirectional instability of the glenohumeral joint: a systematic review. Journal of shoulder and elbow surgery / American Shoulder and Elbow Surgeons ... [et al.]. Jan 2014;23(1):128-142.
				17. Milewski M D, Nissen C W. Pediatric and adolescent shoulder instability. Clinics in sports medicine. Oct 2013;32(4):761-779.
				18. Tamaoki M J, Belloti J C, Lenza M, Matsumoto M H, Gomes Dos Santos J B, Faloppa F. Surgical versus conservative interventions for treating acromioclavicular dislocation of the shoulder in adults. The Cochrane database of systematic reviews. 2010(8):CD007429.
				19. Ceccarelli E, Bondi R, Alviti F, Garofalo R, Miulli F, Padua R. Treatment of acute grade III acromioclavicular dislocation: a lack of evidence. Journal of orthopaedics and traumatology : official journal of the Italian Society of Orthopaedics and Traumatology. Jun 2008;9(2):105-108.
				20. Smith T O, Chester R, Pearse E O, Hing C B. Operative versus non-operative management following Rockwood grade III acromioclavicular separation: a meta-analysis of the current evidence base. Journal of orthopaedics and traumatology : official journal of the Italian Society of Orthopaedics and Traumatology. Mar 2011;12(1):19-27.
				21. Uppal H S, Evans J P, Smith C. Frozen shoulder: A systematic review of therapeutic options. World journal of orthopedics. Mar 18 2015;6(2):263-268.
				22. Grant J A, Schroeder N, Miller B S, Carpenter J E. Comparison of manipulation and arthroscopic capsular release for adhesive capsulitis: a systematic review. Journal of shoulder and elbow surgery / American Shoulder and Elbow Surgeons ... [et al.]. Aug 2013;22(8):1135-1145.
				23. Hanchard N C, Lenza M, Handoll H H, Takwoingi Y. Physical tests for shoulder impingements and local lesions of bursa, tendon or labrum that may accompany impingement. The Cochrane database of systematic reviews. 2013;4:CD007427.
				24. Chen H S, Lin S H, Hsu Y H, Chen S C, Kang J H. A comparison of physical examinations with musculoskeletal ultrasound in the diagnosis of biceps long head tendinitis. Ultrasound in medicine & biology. Sep 2011;37(9):1392-1398.
				25. Cadogan A, McNair P, Laslett M, Hing W. Shoulder pain in primary care: diagnostic accuracy of clinical examination tests for non-traumatic acromioclavicular joint pain. BMC musculoskeletal disorders. 2013;14:156.
				26. Roy J S, Braen C, Leblond J, et al. Diagnostic accuracy of ultrasonography, MRI and MR arthrography in the characterisation of rotator cuff disorders: a meta-analysis. British journal of sports medicine. Feb 11 2015.
				27. Boudreault J, Desmeules F, Roy J S, Dionne C, Fremont P, Macdermid J C. The efficacy of oral non-steroidal anti-inflammatory drugs for rotator cuff tendinopathy: a systematic review and meta-analysis. Journal of rehabilitation medicine. Apr 2014;46(4):294-306.
				28. Buchbinder R, Green S, Youd J M. Corticosteroid injections for shoulder pain. The Cochrane database of systematic reviews. 2003(1):CD004016.
				29. Gialanella B, Bertolinelli M. Corticosteroids injection in rotator cuff tears in elderly patient: pain outcome prediction. Geriatrics & gerontology international. Oct 2013;13(4):993-1001.
				30. Gaujoux-Viala C, Dougados M, Gossec L. Efficacy and safety of steroid injections for shoulder and elbow tendonitis: a meta-analysis of randomised controlled trials. Annals of the rheumatic diseases. Dec 2009;68(12):1843-1849.
				31. Maund E, Craig D, Suekarran S, et al. Management of frozen shoulder: a systematic review and costeffectiveness analysis. Health Technol Assess. 2012;16(11):1-264.
	Ashbaugh, A. N. (2015). Is arthroscopic subacromial decompression effective for shoulder impingement? The Journal of Family Practice., PP 732-734.
	Khan, Y. N. (2013). The painful shoulder: shoulder impingement syndrome. [online]. The open orthopaedics journal. , pp. 347–351.
	Saltychev M, Ä. V. (2015). Conservative treatment or surgery for shoulder impingement: systematic review and meta-analysis. Disability and Rehabiliation, 1-8.
	Loof S., D. B. (2014). Perioperative complications in smokers and the impact of smoking cessation interventions [Dutch]. Tijdschrift voor Geneeskunde, vol./is. 70/4(187-192.
	Milano G1, G. A. (2007). Arthroscopic rotator cuff repair with and without subacromial decompression: a prospective randomized study. http://www.ncbi.nlm.nih.gov/pubmed/17210431.
	Thelwall, S. P. (2015). Impact of obesity on the risk of wound infection following surgery: results from a nationwide prospective multicentre cohort study in England. Clinical microbiology and infection : the official publication of the European Society of Clinical Microbiology and Infectious Diseases, , vol. 21, no. 11, p. 1008.e1.
	Dean B, F. S. (2014). Glucocorticoids induce specific ion-channel mediated toxicity in tendon. British Journal of Sports Medicine.
	Ketola, S. L. (2013). No evidence of long-term benefits of arthroscopic acromioplasty in the treatment of shoulder impingement syndrome. Bone & Joint Research., pp. 132-139.
	Ketola, S. L. (2015). Which patients do not recover from shoulder impingement syndrome, either with operative treatment or with nonoperative treatment? Acta Orthopaedica., PP 1-6.

## Sheet: hip replacement
Region-1	Region-8	Region-3	Region-9	Region-10
NICE. CG 177 (2014, February). NICE. Retrieved from Osteoarthritis: care and management: https://www.nice.org.uk/guidance/cg177/chapter/1-recommendations	NICE CG 177 http://guidance.nice.org.uk/CG177/NICEGuidance/pdf/English	NICE CG 177 (NICE 2008 clinical guideline 177 Osteoarthritis: the care and management of osteoarthritis in adults www.nice.org.uk/guidance/cg177 )
Loof, S. D. (2014). Perioperative complications in smokers and the impact of smoking cessation interventions [Dutch]. Tijdschrift voor Geneeskunde, vol./is. 70/4 (187-192).
NHS Choices. (2014, July 20th). NHS Choices. Retrieved from Hip Replacement: http://www.nhs.uk/Conditions/Hip-replacement/Pages/Introduction.aspx
NICE. (2006, December). NICE. Retrieved from Obesity prevention: https://www.nice.org.uk/guidance/cg43
Thelwall, S. (2015). Impact of obesity on the risk of wound infection following surgery: results from a nationwide prospective multicentre cohort study in England. Clinical microbiology and infection : the official publication of the European Society of Clinical Microbiology and Infectious Diseases, vol. 21, no. 11, p. 1008.e1.
	NHS North West London commissioning policy – Hip Replacement (Total) April 2013.
	Commissioning Guide: Painful osteoarthritis of the hip Royal College of Surgeons (2013).
	Relevant NICE Guidance (TA44) as referred to above http://www.nice.org.uk/guidance/ta304 (broken link)
		1. National Collaborating Centre for Chronic Conditions. Royal College of Physicians 2008.Osteoarthritis, National clinical guideline for care and management in adults.
		3. British Orthopaedic Association Primary Total Hip Replacement: A Guide to Good Practice 2006.
		4. Busato A, Roder C, Herren S, Eggli S. Influence of high BMI on functional outcome after total hip arthroplasty. Obesity Surgery. 2008; 18: 595-600
		5. National Joint Registry Annual report 2012
		6. Huo MH, Osier CJ. Is Cement Still a Fixation Option for Total Hip Arthroplasty? The Journal of Arthroplasty. Vol. 23 No. 7 Suppl. 1 2008
		7. Dheerendra S, Khan W, Saeed MZ, Goddard N. Recent developments in total hip replacements:cementation, articulation, minimal-invasion and navigation. Journal of Perioperative Practice. 2010; 20 (4):133
		8. Morshed S, Bozic KJ, Ries MD, Malchau H, Colford Jr JM. Comparison of cemented and uncemented fixation in total hip replacement A meta-analysis Acta Orthopaedica 2007; 78 (3): 315– 326 315
		9. Guidance on the Selection of Prostheses for Primary Total Hip Replacement NICE 2000 TA
		10. SIGN 2009. Management of hip fracture in older people. National clinical guideline111
		11. Marinelli M, Soccetti A, Panfoli N, de Palma L. Cost-effectiveness of cemented versus cementless tota hip arthroplasty. A Markov decision analysis based on implant cost Journal of Orthopaedics and Traumatology. 2008;9(1): 23-8
		12. The National Hip Fracture Database Analysis Report. 2010.

## Sheet: Dupuytren's
Region-1	Region-3	Region-4a	Region 4b	Region-2	Region-6
NICE. (DEC 2016). Radiation therapy for early Dupuytren's disease. Retrieved from https://www.nice.org.uk/guidance/indevelopment/gid-ipg10022/documents			NICE Interventional procedure guidance (IPG368) Radiation therapy for early Dupuytren’s disease
NICE. (2017). https://www.nice.org.uk/guidance/TA459/chapter/1-Recommendations. Retrieved 08 08, 2017, from https://www.nice.org.uk/guidance/TA459/chapter/1-Recommendations		6. NICE, 2017. Collagenase clostridium histolyticum for treating Dupuytren's contracture. : https://www.nice.org.uk/guidance/ta459,
		2. https://cks.nice.org.uk/dupuytrens-disease	NICE Clinical Knowledge Summaries – Dupuytren’s disease http://cks.nice.org.uk/dupuytrens-disease accessed 14/7/16
	http://www.bssh.ac.uk/education/referralguidelines/dupuytrens_disease.pdf	http://www.bssh.ac.uk/_userfiles/pages/files/Patients/Conditions/Elective/d upuytrens_disease_leaflet_2016.pdf
http://www.dupuytren-online.info/images/tubiana_stages.JPG. (n.d.). Retrieved 08 08, 2017
NHS Choices. (2015, May 29th). Dupuytren's contracture - Treatment . Retrieved from NHS Choices: http://www.nhs.uk/Conditions/Dupuytrens-contracture/Pages/Surgery.aspx
Thelwall, S. P. (2015). Impact of obesity on the risk of wound infection following surgery: results from a nationwide prospective multicentre cohort study in England. Clinical microbiology and infection : the official publication of the European Society of Clinical Microbiology and Infectious Diseases, , vol. 21, no. 11, p. 1008.e1.
Von Campe, A., Kende, K., Omaren, H., & Meuli-Simmen, C. (2012). Painful Nodules and Cords in Dupuytren Disease. The Journal of Hand Surgery, 1313-1318.
Loof S., D. B. (2014). Perioperative complications in smokers and the impact of smoking cessation interventions [Dutch]. Tijdschrift voor Geneeskunde, vol./is. 70/4(187-192.
	2. Dupuytrens Contracture. http://emedicine.medscape.com/article/1285422-overview
	3. Dias JJ, Braybrooke J. Dupuytren's contracture: an audit of the outcomes of surgery.J Hand Surg [Br]. 2006 Oct;31(5):514-21. Epub 2006 Jul 11.			9. Dias J J, Braybrooke J. (2006). Dupuytren's contracture: an audit of the outcomes of surgery. J Hand Surg [Br]. 2006 Oct;31(5):514-21. Epub 2006 Jul 11.
	4. Badalamente MA, Hurst LC. Enzyme injection as nonsurgical treatment of Dupuytren's disease. J Hand Surg [Am] 2000: 25;629-636.Surgery[Am].Volume 33, Issue 7, September 2008,1208-1210. BEST 1			5. Badalamente M A, Hurst L C. (2000). Enzyme injection as nonsurgical treatment of Dupuytren's disease. J Hand Surg [Am] 2000: 25;629-636.
	5. Hueston JT .The table top test. The Hand. 1982, 14; 100-103
	6. Schneider LH. The open palm technique. Hand Clin. Nov 1991;7(4):723-8; discussion 729.
	7. Smith AC. Diagnosis and indications for surgical treatment. Hand Clin. Nov 1991;7(4):635-42; discussion 643.
	8. Andrew JG. Contracture of the proximal interphalangeal joint in Dupuytren's disease. J Hand Surg Br. Nov 1991;16(4):446-8.
		3. Crean SM, Gerber RA, Le Graverand MP, Boyd DM, Cappelleri JC. The efficacy and safety of fasciectomy and fasciotomy for Dupuytren's contracture in European patients: a structured review of published studies. J Hand Surg Eur Vol. 2011;36(5):396-407.
		4. Krefter C, Marks M, Hensler S, Herren DB, Calcagni M. Complications after treating dupuytren's disease. A systematic literature review. Hand surgery & rehabilitation. 2017, 36: 322-9.
		5. NICE 2004. Needle fasciotomy for Dupuytren's contracture. https://www.nice.org.uk/guidance/ipg43		11. NICE guidelines 2004 for Needle Fasciotomy in Dupuytren’s Contracture (reviewed in 2011) http://www.nice.org.uk/guidance/IPG43.
		7.Rodrigues JN, Becker GW, Ball C, Zhang W, Giele H, Hobby J, et al. Surgery for Dupuytren's contracture of the fingers. Cochrane Database Syst Rev. 2015(12):CD010143.
		8. Scherman P, Jenmalm P, Dahlin LB. Three-year recurrence of Dupuytren's contracture after needle fasciotomy and collagenase injection: a two-centre randomized controlled trial. J Hand Surg Eur Vol. 2018;43(8):836-40.
		9. Skov ST, Bisgaard T, Sondergaard P, Lange J. Injectable Collagenase Versus Percutaneous Needle Fasciotomy for Dupuytren Contracture in Proximal Interphalangeal Joints: A Randomized Controlled Trial. J Hand Surg Am. 2017;42(5):321-8 e3.
		10. Stromberg J, Ibsen Sorensen A, Friden J. Percutaneous Needle Fasciotomy Versus Collagenase Treatment for Dupuytren Contracture: A Randomized Controlled Trial with a Two-Year Follow-up. J Bone Joint Surg Am. 2018;100(13):1079-86.
		11. van Rijssen AL, Gerbrandy FS, Ter Linden H, Klip H, Werker PM. A comparison of the direct outcomes of percutaneous needle fasciotomy and limited fasciectomy for Dupuytren's disease: A 6-week follow-up study. J Hand Surg Am. 2006, 31: 717-25.
		12. van Rijssen AL, ter Linden H, Werker PM. Five-year results of a randomized clinical trial on treatment in Dupuytren's disease: Percutaneous needle fasciotomy versus limited fasciectomy. Plast Reconstr Surg. 2012, 129: 469-77.
			Townley, W.A., Baker, R., Sheppard, N. and Grobbelaar, A.O. (2006) Dupuytren’s Contracture unfolded. British Medical Journal 332: 397-400
				1. McGrouther D A. (1998). Dupuytren’s contracture. In D P Green, R N Hotchkiss and W C Pederson (Eds) Operative HAND Surgery, Vol 1, 4th edition. New York: Churchill Livingstone, 1998. 563-591.
				2. British Society for Surgery of the Hand (2010) BSSH Evidence for Surgical Treatment (BEST): Dupuytren’s contracture [Online] Available from: http://www.bssh.ac.uk/education/guidelines/dd_guidelines.pdf .
				3. C Furlong. Preoperative Smoking Cessation: A Model to Estimate Potential Short Term Health Gain and Reductions in Length of Stay. A report by London Health Observatory. September 2005.
				4. S Hajioff, M Bhatti. Pre-operative smoking cessation therapy in NCL. A case of short-term gain for long-term gain?
				6. Foucher G, Medina J, Navarro R. (2003). Percutaneous needle aponeurotomy: complications and results. J Hand Surg Br. Oct 2003;28(5):427-31.
				7. Rayan G M. (2008). Nonoperative Treatment of Dupuytren's Disease. J of Hand Surgery[Am].Volume 33, Issue 7, September 2008,1208-1210.
				8. Lee S, Baytion M. (2006). Dupuytren contracture. E-Medicine. December 2006.
				10. Hurst L C, Badalamente MA. (1999). Nonoperative treatment of Dupuytren's disease. Hand Clin 1999 Feb;15(1):97-107.
				12. NICE guidelines 2010 for Radiation therapy for early Dupuytren's disease (reviewed in 2011) http://guidance.nice.org.uk/IPG368/PublicInfo/pdf/English.
				13. Clinical Knowledge Summaries- Dupuytren’s Disease (May 2010). [Online] Available from: http://cks.nice.org.uk/dupuytrens-disease#!backgroundsub:3.
				14. The American Heritage® Medical Dictionary Copy

## Sheet: Trigger finger
Region-1	Region-3	Region-4b	Region-13	Region-2
Hand, T. B. (2016, August). BEST Guidelines on Treatment of Trigger Digits: Draft for “Public Consultation. Retrieved from The British Society for Surgery of the Hand: http://www.bssh.ac.uk/patients/best.aspx				British Society for Surgery of the Hand (2010) BSSH Evidence for Surgical Treatment (BEST): Trigger Finger (Stenosing Tenosynovitis) [Online] Available from: http://www.bssh.ac.uk/education/guidelines/trigger.pd
Loof S., D. B. (2014). Perioperative complications in smokers and the impact of smoking cessation interventions [Dutch]. Tijdschrift voor Geneeskunde, vol./is. 70/4(187-192.
NHS Choices. (2014, September 18). NHS Choices. Retrieved from Carpal tunnel syndrome : http://www.nhs.uk/conditions/carpal-tunnel-syndrome/Pages/Whatisit.aspx
NHS Choices. (2015, May 29th). Dupuytren's contracture - Treatment . Retrieved from NHS Choices: http://www.nhs.uk/Conditions/Dupuytrens-contracture/Pages/Surgery.aspx
NHS Choices. (2015, September 1st). Trigger finger . Retrieved from NHS Choices: http://www.nhs.uk/Conditions/Trigger-finger/Pages/Introduction.aspx		http://www.nhs.uk/Conditions/Trigger-finger/Pages/Introduction.aspx (accessed 15/07/16)
NHS Choices. (2015, September 1st). Trigger finger - Treatment . Retrieved from NHS Choices: http://www.nhs.uk/Conditions/Trigger-finger/Pages/Theprocedure.aspx
Thelwall, S. P. (2015). Impact of obesity on the risk of wound infection following surgery: results from a nationwide prospective multicentre cohort study in England. Clinical microbiology and infection : the official publication of the European Society of Clinical Microbiology and Infectious Diseases, , vol. 21, no. 11, p. 1008.e1.
		Bionka et al. (2014) Multidisciplinary Consensus Guideline for Managing Trigger Finger: Results from the European HANDGUIDE Study. Physical Therapy 94 (10) 1421- 1433
	1. Schofield CB, Citron ND. The natural history of adult trigger thumb. J Hand Surg [Br].1993 Apr;18(2):247-8.			Schofield C B, Citron N D. (1993). The natural history of adult trigger thumb. J Hand Surg [Br]. 1993 Apr;18(2):247-8.
	2. Fleisch SB, Spindler KP, Lee DH. Corticosteroid injections in the treatment of trigger finger: a level I and II systematic review. J Am Acad Orthop Surg. 2007 Mar;15(3):166-71. Review.
	3. Peters-Veluthamaningal C, Winters JC, Groenier KH, Jong BM. Corticosteroid injections effective for trigger finger in adults in general practice: a double-blinded randomised placebo controlled trial. Ann Rheum Dis. 2008 Sep;67(9):1262-6. Epub 2008 Jan 7.
	4. Akhtar S, Burke FD. Study to outline the efficacy and illustrate techniques for steroid injection for trigger finger and thumb. Postgrad Med J. 2006 Nov;82(973):763-6. Review.
	5. Ring D, Lozano-Calderón S, Shin R, Bastian P, Mudgal C, Jupiter J. A prospective randomized controlled trial of injection of dexamethasone versus triamcinolone for idiopathic trigger finger. J Hand Surg [Am]. 2008 Apr;33(4):516-22; discussion 523-4.
	6. Baumgarten KM. Current treatment of trigger digits in patients with diabetes mellitus. J Hand Surg [Am]. 2008 Jul-Aug;33(6):980-1. Review.
				10. Blacks Medical Dictionary. 42nd Edition. A & C Black. London 2010.
				Doyle J R. (1988). Anatomy of the finger flexor tendon sheath and pulley system. J. Hand Surg. Vol 13-A. 1988. p 473.
				Sato E S, Gomes Dos Santos J B, et al. (2011) Treatment of trigger finger: randomized clinical trial comparing the methods of corticosteroid injection, percutaneous release and open surgery. Rheumatology (Oxford). 2012 Jan;51(1):93-9.
				Kerrigan C L, Stanwix M G. (2009). Using evidence to minimize the cost of trigger finger care. J Hand Surg Am. 2009 Jul-Aug;34(6):997-1005.
				Sheryl B, Fleisch, B S, et al. (2007). Corticosteroid Injections in the Treatment of Trigger Finger: A Level I and II Systematic Review. J Am Acad Orthop Surg, Vol 15, No 3, March 2007, 166-171.
				Wolfe S W. Tenosynovitis, 2137-2158, Chapter 60. Green’s Operative Hand Surgery Ed’s Green DP, Hotchkiss RN, Pederson W C, Wolfe S W . Elsevier, Churchill Livingstone, 2005.
				S Hajioff, M Bhatti. Pre-operative smoking cessation therapy in NCL. A case of short-term gain for long-term gain?
				C Furlong. Preoperative Smoking Cessation: A Model to Estimate Potential Short Term Health Gain and Reductions in Length of Stay. A report by London Health Observatory. September 2005.

## Sheet: knee replacement
Region-1	Region-3	Region-7
NICE . (2014, February). Osteoarthritis: care and management CG117. Retrieved from NICE: https://www.nice.org.uk/guidance/cg177	3. NICE, CG 177, Osteoarthritis: Care and management in adults, 2014 http://www.nice.org.uk/guidance/cg177
NICE. (n.d.). Mini-incision surgery for total knee replacement. Retrieved May 18, 2016, https://www.nice.org.uk/guidance/ipg345from NICE:	4. NICE Mini-incision surgery for total knee replacement. May 2010
Fu Y, W. G. (2011). Patellar resurfacing in total knee arthroplasty for osteoarthritis: a metaanalysis. European Society of Sports Traumatology, Knee Surgery & Arthroscopy.
Isis Innovation. (n.d.). Oxford Knee Score - Threshold for knee replacement. Retrieved 05 19, 2016, from www.orthopaedicscores.com: http://www.orthopaedicscore.com/scorepages/oxford_knee_score.html
Leyland, K. M.-P.-A. (April 2016 ). Obesity and the Relative Risk of Knee Replacement Surgery in Patients With Knee Osteoarthritis: A Prospective Cohort Study. Arthritis & rheumatology (Hoboken, N.J.), , vol. 68, no. 4, p. 817-825.
Loof S., D. B. (2014). Perioperative complications in smokers and the impact of smoking cessation interventions [Dutch]. Tijdschrift voor Geneeskunde, vol./is. 70/4(187-192.
Monitor and NHS England. (2016, May 13). NHS National Tariff Payment System 2016/17. Retrieved from Gov.Uk: https://www.gov.uk/government/publications/nhs-national-tariff-paymentsystem-201617
National Joint Registry. (n.d.). Joint Replacements. Retrieved 05 18, 2016, from NJR Centre: http://www.njrcentre.org.uk/njrcentre/Patients/Jointreplacements/tabid/93/Default.aspx
NHS Choices. (2015, July 14). NHS Choices. Retrieved from Knee Replacement: http://www.nhs.uk/Conditions/Knee-replacement/Pages/Kneereplacementexplained.aspx
Orthopaedic Data Evaluation Panel . (n.d.). http://www.odep.org.uk/products.aspx?typeid=3. Retrieved May 18, 2016, from Orthopaedic Data Evaluation Panel : http://www.odep.org.uk/Home.aspx
Thelwall, S. P. (2015). Impact of obesity on the risk of wound infection following surgery: results from a nationwide prospective multicentre cohort study in England. Clinical microbiology and infection : the official publication of the European Society of Clinical Microbiology and Infectious Diseases, , vol. 21, no. 11, p. 1008.e1.
	2. The National Collaborating Centre for Chronic Conditions. Royal College of Physicians of London 2008. Osteoarthritis, National clinical guideline for care and management in adults.
	1. NICE Referral Advice. A guide to appropriate referral from general to specialist services. 2001
	5. British Orthopaedic Association Total Knee Replacement; A Guide to Best Practice. 1999
	6. Quintana JM, Escobar A, Arostegui I, Bilbao A, Azkarate J, Goenaga I and Arenaza J. Health related quality of life and appropriateness of knee or hip joint replacement
	7. Escobar A, Quintana JM, Arostehui I, Azkarate J, Güenaga, Arenaza JC, Garai I.Development of explicit criteria for total knee replacement. International Journal of Technology Assessment in Healthcare, 2003; 19: 57-70.

## Sheet: Rotator cuff
Region-1	Region-2	Region-14
Ashbaugh, A. N. (2015). Is arthroscopic subacromial decompression effective for shoulder impingement ? The Journal of Family Practice., PP 732-734.		1. Subacromial shoulder pain BESS/BOA Patient Care Pathways [online] Available from:http://www.bess.org.uk/media/Research%20Committee/National%20Guidelines/Subacromial%20Shoulder%Pain.pdf
Royal College of Surgeons. (n.d.). Commissioning guide: Subacromial Shoulder Pain. Retrieved 05 21, 2016, from http://www.rcseng.ac.uk/healthcare-bodies/docs/commissioning-guidesboa/subacromial-shoulder-pain-commissioning-guide.		2. Royal College of Surgeons. Commissioning guide: Subacromial Shoulder Pain [online] Available from: https://www.rcseng.ac.uk/library-and-publications/college-publications/docs/subacromial-shoulder-pain
Khan, Y. N. (2013). The painful shoulder: shoulder impingement syndrome. [online]. The open orthopaedics journal. , pp. 347–351.		3. Khan, Y.N. (2013). The painful shoulder: shoulder impingement syndrome. The Open Orthopaedics Journal. [online] Available from: V 2 January 2018 https://www.ncbi.nlm.nih.gov/pmc/articles/PMC3785027
Saltychev M, Ä. V. (2015). Conservative treatment or surgery for shoulder impingement: systematic review and meta-analysis. Disability and Rehabiliation, 1-8.		8. Saltychev M, Ä. V. (2015). Conservative treatment or surgery for shoulder impingement: systematic review and meta-analysis. Disability and Rehabiliation, 1-8.
Loof S., D. B. (2014). Perioperative complications in smokers and the impact of smoking cessation interventions [Dutch]. Tijdschrift voor Geneeskunde, vol./is. 70/4(187-192.
Milano G1, G. A. (2007). Arthroscopic rotator cuff repair with and without subacromial decompression: a prospective randomized study. http://www.ncbi.nlm.nih.gov/pubmed/17210431.
Thelwall, S. P. (2015). Impact of obesity on the risk of wound infection following surgery: results from a nationwide prospective multicentre cohort study in England. Clinical microbiology and infection : the official publication of the European Society of Clinical Microbiology and Infectious Diseases, , vol. 21, no. 11, p. 1008.e1.
Dean B, F. S. (2014). Glucocorticoids induce specific ion-channel mediated toxicity in tendon. British Journal of Sports Medicine.
Ketola, S. L. (2013). No evidence of long-term benefits of arthroscopic acromioplasty in the treatment of shoulder impingement syndrome. Bone & Joint Research., pp. 132-139.
Ketola, S. L. (2015). Which patients do not recover from shoulder impingement syndrome, either with operative treatment or with nonoperative treatment? Acta Orthopaedica., PP 1-6.
		4. Can shoulder arthroscopy work (CSAW) [online] Available from: https://www.situ.ox.ac.uk/surgical-trials/csaw
		5. UK Rotator Cuff Surgery Trial (UKUFF) [online] Available from: http://www.nets.nihr.ac.uk/projects/hta/054702
		6. Mitchell C, Adebajo A, Hay E, et al. Shoulder pain: diagnosis and management in primary care. BMJ: British Medical Journal 2005;331(7525):1124.
		7. Ashbaugh, A. N. (2015). Is arthroscopic subacromial decompression effective for shoulder impingement ? The Journal of Family Practice., PP 732-734.
		9. NHS Oxfordshire Clinical Commissioning Group (20**) Subacromial Decompression of the Shoulder [online] Available from: http://www.oxfordshireccg.nhs.uk/wp-content/uploads/2013/03/PS269-Subacromial-decompression-of-the-shoulder.pdf
		10. NHS North Somerset Clinical Commissioning Group (20**) Shoulder Impingement Surgery for Subacromial Pain [online] Available from: https://www.northsomersetccg.nhs.uk/media/medialibrary/2016/10/Shoulder_Impingement_Surgery_for_Subacromial_Pain_Policy_EV3y34d.pdf
		11. NHS Wokingham Clinical Commissioning Group (20**) Subacromial Decompression of the Shoulder [online] Available from: http://www.wokinghamccg.nhs.uk/publications/meetings/governing-body-meetings/2016/06-12-2016/wok161209c-ccg-policy-adoption-template-subacromial-decompression-of-the-shoulder-v1-1
	1. Moosmayer S, Lund G, Seljom U, et al. Comparison between surgery and physiotherapy in the treatment of small and medium-sized tears of the rotator cuff: A randomised controlled study of 103 patients with one-year follow-up. The Journal of bone and joint surgery. British volume. Jan 2010;92(1):83-91.
	2. Moosmayer S, Lund G, Seljom U S, et al. Tendon repair compared with physiotherapy in the treatment of rotator cuff tears: a randomized controlled study in 103 cases with a five-year follow-up. The Journal of bone and joint surgery. American volume. Sep 17 2014;96(18):1504-1514.
	3. Kukkonen J, Joukainen A, Lehtinen J, et al. Treatment of non-traumatic rotator cuff tears: A randomised controlled trial with one-year clinical results. The bone & joint journal. Jan 2014;96-B(1):75-81.
	4. Rahme H, Solem-Bertoft E, Westerberg C E, Lundberg E, Sorensen S, Hilding S. The subacromial impingement syndrome. A study of results of treatment with special emphasis on predictive factors and paingenerating mechanisms. Scandinavian journal of rehabilitation medicine. Dec 1998;30(4):253-262.
	5. Haahr J P, Ostergaard S, Dalsgaard J, et al. Exercises versus arthroscopic decompression in patients with subacromial impingement: a randomised, controlled study in 90 cases with a one year follow up. Annals of the rheumatic diseases. May 2005;64(5):760-764.
	6. Brox J I, Staff P H, Ljunggren A E, Brevik J I. Arthroscopic surgery compared with supervised exercises in patients with rotator cuff disease (stage II impingement syndrome). BMJ. Oct 9 1993;307(6909):899-903.
	7. de Witte P B, Selten J W, Navas A, et al. Calcific tendinitis of the rotator cuff: a randomized controlled trial of ultrasound-guided needling and lavage versus subacromial corticosteroids. The American journal of sports medicine. Jul 2013;41(7):1665-1673.
	8. Gupta A K, Chalmers P N, Klosterman E L, et al. Subpectoral biceps tenodesis for bicipital tendonitis with SLAP tear. Orthopedics. Jan 2015;38(1):e48-53.
	9. Taylor S A, Fabricant P D, Baret N J, et al. Midterm clinical outcomes for arthroscopic subdeltoid transfer of the long head of the biceps tendon to the conjoint tendon. Arthroscopy : the journal of arthroscopic & related surgery : official publication of the Arthroscopy Association of North America and the International Arthroscopy Association. Dec 2014;30(12):1574-1581.
	10. Kelly A M, Drakos M C, Fealy S, Taylor S A, O'Brien S J. Arthroscopic release of the long head of the biceps tendon: functional outcome and clinical results. The American journal of sports medicine. Feb 2005;33(2):208213.
	11. Tokish JM, McBratney CM, Solomon DJ, Leclere L, Dewing CB, Provencher MT. Arthroscopic repair of circumferential lesions of the glenoid labrum: surgical technique. The Journal of bone and joint surgery. American volume. Sep 2010;92 Suppl 1 Pt 2:130-144.
	12. Smitherman J A, Struk A M, Cricchio M, et al. Arthroscopy and manipulation versus home therapy program in treatment of adhesive capsulitis of the shoulder: a prospective randomized study. Journal of surgical orthopaedic advances. Spring 2015;24(1):69-74.
	13. National Institute for Health and Care Excellence. NICE clinical guidance 177. Osteoarthritis: care and management in adults. 2014.
	14. Handoll H H, Almaiyah M A, Rangan A. Surgical versus non-surgical treatment for acute anterior shoulder dislocation. The Cochrane database of systematic reviews. 2004(1):CD00432\a5.
	15. Jakobsen B W, Johannsen H V, Suder P, Sojbjerg J O. Primary repair versus conservative treatment of firsttime traumatic anterior dislocation of the shoulder: a randomized study with 10-year follow-up. Arthroscopy : the journal of arthroscopic & related surgery : official publication of the Arthroscopy Association of North America and the International Arthroscopy Association. Feb 2007;23(2):1…
	16. Warby S A, Pizzari T, Ford J J, Hahne A J, Watson L. The effect of exercise-based management for multidirectional instability of the glenohumeral joint: a systematic review. Journal of shoulder and elbow surgery / American Shoulder and Elbow Surgeons ... [et al.]. Jan 2014;23(1):128-142.
	17. Milewski M D, Nissen C W. Pediatric and adolescent shoulder instability. Clinics in sports medicine. Oct 2013;32(4):761-779.
	18. Tamaoki M J, Belloti J C, Lenza M, Matsumoto M H, Gomes Dos Santos J B, Faloppa F. Surgical versus conservative interventions for treating acromioclavicular dislocation of the shoulder in adults. The Cochrane database of systematic reviews. 2010(8):CD007429.
	19. Ceccarelli E, Bondi R, Alviti F, Garofalo R, Miulli F, Padua R. Treatment of acute grade III acromioclavicular dislocation: a lack of evidence. Journal of orthopaedics and traumatology : official journal of the Italian Society of Orthopaedics and Traumatology. Jun 2008;9(2):105-108.
	20. Smith T O, Chester R, Pearse E O, Hing C B. Operative versus non-operative management following Rockwood grade III acromioclavicular separation: a meta-analysis of the current evidence base. Journal of orthopaedics and traumatology : official journal of the Italian Society of Orthopaedics and Traumatology. Mar 2011;12(1):19-27.
	21. Uppal H S, Evans J P, Smith C. Frozen shoulder: A systematic review of therapeutic options. World journal of orthopedics. Mar 18 2015;6(2):263-268.
	22. Grant J A, Schroeder N, Miller B S, Carpenter J E. Comparison of manipulation and arthroscopic capsular release for adhesive capsulitis: a systematic review. Journal of shoulder and elbow surgery / American Shoulder and Elbow Surgeons ... [et al.]. Aug 2013;22(8):1135-1145.
	23. Hanchard N C, Lenza M, Handoll H H, Takwoingi Y. Physical tests for shoulder impingements and local lesions of bursa, tendon or labrum that may accompany impingement. The Cochrane database of systematic reviews. 2013;4:CD007427.
	24. Chen H S, Lin S H, Hsu Y H, Chen S C, Kang J H. A comparison of physical examinations with musculoskeletal ultrasound in the diagnosis of biceps long head tendinitis. Ultrasound in medicine & biology. Sep 2011;37(9):1392-1398.
	25. Cadogan A, McNair P, Laslett M, Hing W. Shoulder pain in primary care: diagnostic accuracy of clinical examination tests for non-traumatic acromioclavicular joint pain. BMC musculoskeletal disorders. 2013;14:156.
	26. Roy J S, Braen C, Leblond J, et al. Diagnostic accuracy of ultrasonography, MRI and MR arthrography in the characterisation of rotator cuff disorders: a meta-analysis. British journal of sports medicine. Feb 11 2015.
	27. Boudreault J, Desmeules F, Roy J S, Dionne C, Fremont P, Macdermid J C. The efficacy of oral non-steroidal anti-inflammatory drugs for rotator cuff tendinopathy: a systematic review and meta-analysis. Journal of rehabilitation medicine. Apr 2014;46(4):294-306.
	28. Buchbinder R, Green S, Youd J M. Corticosteroid injections for shoulder pain. The Cochrane database of systematic reviews. 2003(1):CD004016.
	29. Gialanella B, Bertolinelli M. Corticosteroids injection in rotator cuff tears in elderly patient: pain outcome prediction. Geriatrics & gerontology international. Oct 2013;13(4):993-1001.
	30. Gaujoux-Viala C, Dougados M, Gossec L. Efficacy and safety of steroid injections for shoulder and elbow tendonitis: a meta-analysis of randomised controlled trials. Annals of the rheumatic diseases. Dec 2009;68(12):1843-1849.
	31. Maund E, Craig D, Suekarran S, et al. Management of frozen shoulder: a systematic review and costeffectiveness analysis. Health Technol Assess. 2012;16(11):1-264.
Different numbers of references across all three policies. No common references between BNSSG and Cambridge. Chorley cited a few references, some of which matched BNSSG. Cambridge cited several systematic reviews and a Cochrane review. BNSSG cited one (different) systematic review. Chorley did not cite any. Different RCTs were cited in BNSSG and Cambridge. Chorley did not cite any RCTs. Chorley a…
Chorley had references that did not appear in the main body of the policy. Some of these references were other CCGs' policies
RCT
Systematic review
National guidance

## Sheet: Hip arthroscopy
Region-1	Region-6	Region-4a	Region-4b
NICE. (2011, September). NICE. Retrieved from Arthroscopic femoro–acetabular surgery for hip impingement syndrome: https://www.nice.org.uk/guidance/ipg408	Arthroscopic femoro-acetabular surgery for hip impingement syndrome. Interventional procedure guidance 408, London, UK NICE, September 2011. Available at: http://guidance.nice.org.uk/IPG408/Guidance/pdf/English	1. NICE IPG 408 (Sept 2011) Arthroscopic femoro-acetabular surgery for hip impingement syndrome http://guidance.nice.org.uk/IPG408	NICE. Arthroscopic femoro–acetabular surgery for hip impingement syndrome. IPG 408 Sept 2011.
NICE. (2011, July). NICE. Retrieved from Open femoro–acetabular surgery for hip impingement syndrome: https://www.nice.org.uk/guidance/ipg403	NICE. National Institute for Health and Clinical Excellence. Open femoro-acetabular surgery for hip impingement syndrome’ IPG403 July 2011 http://guidance.nice.org.uk/IPG403/Guidance/pdf/English
	i Macfarlane RJ, Haddad FS The diagnosis and management of femoro-acetabular impingement. Annals of the Royal College of Surgeons of England, July 2010, vol./is. 92/5(363-7),	3. Macfarlane RJ, Haddad FS The diagnosis and management of femoroacetabular impingement. Annals of the Royal College of Surgeons of England, July 2010, vol./is. 92/5(363-7) http://www.ncbi.nlm.nih.gov/pmc/articles/PMC3180305/pdf/rcse9205-363.pdf
	Ng VY, Arora N, Best TM, Pan X, Ellis TJ. Efficacy of Surgery for Femoroacetabular Impingement: A Systematic Review. Am J Sports Med. 2010 May 20	Ng V Y et al. Efficacy of Surgery for Femoro-acetabular Impingement: A Systematic Review. Am J Sports Med November 2010 38 2337-2345 http://www.ncbi.nlm.nih.gov/pubmed/20489213
British Hip Society. (2016, April). Non Arthroplasty Hip Register - NAHR. Retrieved April 14, 2016, from British Hip Society : https://www.britishhipsociety.com/main?page=NAHR
Loof, S. D. (2014). Perioperative complications in smokers and the impact of smoking cessation interventions [Dutch]. Tijdschrift voor Geneeskunde, vol./is. 70/4 (187-192).
Thelwall, S. (2015). Impact of obesity on the risk of wound infection following surgery: results from a nationwide prospective multicentre cohort study in England. Clinical microbiology and infection : the official publication of the European Society of Clinical Microbiology and Infectious Diseases, vol. 21, no. 11, p. 1008.e1.
	Bardakos, NV, Villar RN. Predictors of progression of osteoarthritis in femoroacetabular impingement. J Bone Joint Surg Br 2009;91:162-9
	Leunig M. Beaulé PE, Ganz R The Concept of Femoroacetabular Impingement: Current Status and Future Perspectives. Clin Orthop Relat Res. 2009 March; 467(3): 616–622.
	Clohisy JC, St John LC, Schutz AL. Surgical treatment of femoroacetabular impingement: a systematic review of the literature. Clin Orthop Relat Res. 2010 Feb; 468(2):555-64.
		2. Vijay D Shetty, Richard N Villar. Hip arthroscopy: current concepts and review of literature. Br J Sports Med 2007;41:64–68. http://www.ncbi.nlm.nih.gov/pmc/articles/PMC2658928/pdf/64.pdf
			Hip Surgery Procedures for Treatment of Femoroacetabular Impingement Syndrome. Washington State Health Technology Assessment. July 2011 http://www.hta.hca.wa.go accessed 14/7/16

## Sheet: Knee arthroscopy
S5. Detailed references	Region-4a	Region-3	Region-5	Region-2
NICE. (n.d.). Arthroscopic knee washout, with or without debridement, for the treatment of osteoarthritis. Retrieved from www.nice.org.uk: https://www.nice.org.uk/guidance/ipg230/chapter/1-guidance	2. National Institute for Health and Clinical Excellence – Arthroscopic knee washout, with or without debridement, for the treatment of osteoarthritis – guidance issue date: 22 August 2007. http://www.nice.org.uk/IPG230	N.I.C.E. Interventional Procedure Guidance IPG230- Arthroscopic knee washout, with or without debridement, for the treatment of osteoarthritis (August 2007)		. NICE Interventional Procedure Guidance 230. Arthroscopic knee washout, with or without debridement, for the treatment of osteoarthritis. 2007.
	3. Care and Management of Osteoarthritis NICE Clinical Guidelines CG177 Feb 2014 http://www.nice.org.uk/guidance/CG177/chapter/1-Recommendations#referral-for-consideration-of-joint-surgery-	 NICE, CG 177, Osteoarthritis: Care and management in adults, 2014 http://www.nice.org.uk/guidance/cg177		NICE Clinical Guideline 177. Osteoarthritis: Care and management in adults. 2014.
	24. Laupattarakasem W et al. Arthroscopic debridement for knee osteoarthritis. The Cochrane database of systematic reviews 2008.	Laupattarakasem W, Laopaiboon M, Laupattarakasem P, Sumananont C. Arthroscopic debridement for knee osteoarthritis. Cochrane Database of Systematic Reviews 2008, Issue 1. Art. No.: CD005118. DOI: 10.1002/14651858.CD005118.pub2.		. Laupattarakasem W, Laopaiboon M, Laupattarakasem P, Sumananont C. Arthroscopic debridement for knee osteoarthritis. The Cochrane database of systematic reviews 2008.
Sihvonen R1, P. M., & Group, F. D. (2014). Arthroscopic partial meniscectomy versus sham surgery for a degenerative meniscal tear. The New England Journal of Medicine.	5. Sihvonen R et al for the Finnish Degenerative Meniscal Lesion Study (FIDELITY) Group. Arthroscopic Partial Meniscectomy versus Sham Surgery for a Degenerative Meniscal Tear. N Engl J Med 2013;369:2515-24.			1. Sihvonen R, Paavola M, Malmivaara A, Itälä A, Joukainen A, Nurmi H, Kalske J, Järvinen TLN for the Finnish Degenerative Meniscal Lesion Study (FIDELITY) Group. Arthroscopic Partial Meniscectomy versus Sham Surgery for a Degenerative Meniscal Tear. N Engl J Med 2013;369:2515-24.
	4. Moseley JB, O’Malley K, Petersen NJ, et al. A controlled trial of arthroscopic surgery for osteoarthritis of the knee. N Engl J Med 2002;347:81-8.
	6. Katz J N et al Surgery versus Physical Therapy for a Meniscal Tear and Osteoarthritis. N Engl J Med 2013; 368(18): 1675-84.			Katz J N, Brophy R H, Chaisson C E, de Chaves L P T, Cole B J, Dahm D L, Donnell-Fink L A, Guermazi A, Haas A K, Jones M H, Levy B A, Mandl L A, Martin S D, Marx R G, Miniaci A, Matava M J, Palmisano J, Reinke E K, Richardson B E, Rome B N, Safran-Norton C E, Skoniecki D J, Solomon D H, Smith M V, Spindler K P, Stuart M J, Wright J, Wright R W, Losina E. Surgery versus Physical Therapy for a Meni…
	7. Herrlin S V et al Is arthroscopic surgery beneficial in treating non-traumatic, degenerative medial meniscal tears? A five year follow-up. Knee Surg Sports Traumatol Arthrosc (2013) 1:358–364.			Herrlin S V, Wange P O, Lapidus G, Hallander M, Werner S, Weidenhielm L. Is arthroscopic surgery beneficial in treating non-traumatic, degenerative medial meniscal tears? A five year follow-up. Knee Surg Sports Traumatol Arthrosc (2013) 21:358–364.
	8. Hing C B, Smith T O, Donell S, Song F. Surgical versus non-surgical interventions for treating patellar dislocation. The Cochrane database of systematic reviews 2011.			Hing C B, Smith T O, Donell S, Song F. Surgical versus non-surgical interventions for treating patellar dislocation. The Cochrane database of systematic reviews 2011.
	9. Kettunen J A et al Knee arthroscopy and exercise versus exercise only for chronic patellofemoral pain syndrome: a randomized controlled trial. BMC Medicine 2007;5:38.			Kettunen J A, Harilainen A, Sandelin J, Schlenzka D, Hietaniemi K, Seitsalo S, Malmivaara A and Kujala U M. Knee arthroscopy and exercise versus exercise only for chronic patellofemoral pain syndrome: a randomized controlled trial. BMC Medicine 2007;5:38.
	10. Jameson S S et al The burden of arthroscopy of the knee: a contemporary analysis of data from the English NHS. J Bone Joint Surg Br. 2011 Oct;93(10):1327-33.			Jameson S S, Dowen D, James P, Serrano-Pedraza I, Reed M R, Deehan D J. The burden of arthroscopy of the knee: a contemporary analysis of data from the English NHS. J Bone Joint Surg Br. 2011 Oct;93(10):1327-33.
	11. Ashraf A et al Acute and subacute complications of pediatric and adolescent knee arthroscopy. Arthroscopy. 2014 Jun;30(6):710-4.			Ashraf A, Luo T D, Christophersen C, Hunter L R, Dahm D L, McIntosh A L. Acute and subacute complications of pediatric and adolescent knee arthroscopy. Arthroscopy. 2014 Jun;30(6):710-4.
	12. Petty C A, and Lubowitz J H. Does Arthroscopic Partial Meniscectomy Result in Knee Osteoarthritis? A Systematic Review With a Minimum of 8 Years’ Follow-up. Arthroscopy 2011; 27(3):419-424.			12. Petty C A, and Lubowitz J H. Does Arthroscopic Partial Meniscectomy Result in Knee Osteoarthritis? A Systematic Review With a Minimum of 8 Years’ Follow-up. Arthroscopy 2011; 27(3):419-424.
	13. Piedade S R et al Is previous knee arthroscopy related to worse results in primary total knee arthroplasty? Knee Surg Sports Traumatol Arthrosc 2009; 17:328–333.			13. Piedade S R et al Is previous knee arthroscopy related to worse results in primary total knee arthroplasty? Knee Surg Sports Traumatol Arthrosc 2009; 17:328–333.
	14. Thorlund J B, Juhl C B, Roos E M, Lohmander L S. Arthroscopic surgery for degenerative knee disease: systematic review and meta analysis of benefits and harms. BMJ 2015;350:h2747. http://www.bmj.com/content/350/bmj.h2747			14. Thorlund J B, Juhl C B, Roos E M, Lohmander L S. Arthroscopic surgery for degenerative knee disease: systematic review and meta analysis of benefits and harms. BMJ 2015;350:h2747. http://www.bmj.com/content/350/bmj.h2747
	15. Price A, Beard D. Arthroscopy for degenerate meniscal tears of the knee. BMJ 2014;348:g2382.			15. Price A, Beard D. Arthroscopy for degenerate meniscal tears of the knee. BMJ 2014;348:g2382.
	16. Arthroscopic surgery for degenerative knee: overused, ineffective and potentially harmful BMJ2015; 350 doi: http://dx.doi.org/10.1136/bmj.h2983 (Published 16 June 2015)
	17. Arthroscopic surgery for knee pain. A highly questionable practice without supporting evidence of even moderate quality BMJ2016; 354 doi: http://dx.doi.org/10.1136/bmj.i3934 ( Published 20 July 2016)
	18. Khan M et al M. Arthroscopic surgery for degenerative tears of the meniscus: a systematic review and meta-analysis. CMAJ 2014;186:1057- 64.
	19. Kise NJ et al Exercise therapy versus arthroscopic partial meniscectomy for degenerative meniscal tear in middle aged patients: randomised controlled trial with two year follow-up. BMJ2016;354:i3740.
	20. Guermazi A et al. Prevalence of abnormalities in knees detected by MRI in adults without knee osteoarthritis: population based observational study (Framingham Osteoarthritis Study). BMJ2012;345:e5339.
	21. Prasad V, Cifu A, Ioannidis JP. Reversals of established medical practices: evidence to abandon ship. JAMA2012;307:37-8.
	22. Crawford R et al. Magnetic resonance imaging versus arthroscopy in the diagnosis of knee pathology, concentrating on meniscal lesions and ACL tears: a systematic review. British medical bulletin 2007;84:5-23.			22. Crawford R et al. Magnetic resonance imaging versus arthroscopy in the diagnosis of knee pathology, concentrating on meniscal lesions and ACL tears: a systematic review. British medical bulletin 2007;84:5-23.
	23. Bryan S et al. The cost-effectiveness of magnetic resonance imaging for investigation of the knee joint. Health Technol Assess 2001;5(27):1-95.			23. Bryan S et al. The cost-effectiveness of magnetic resonance imaging for investigation of the knee joint. Health Technol Assess 2001;5(27):1-95.
	1. Painful osteoarthritis of the knee - Royal college of surgeons/BOA commissioning guide November 2013 https://www.boa.ac.uk/wp- content/uploads/2014/08/Painful-osteoarthritis-of-the-knee_Revised-final.pdf
	25. Health Quality Ontario. Arthroscopic lavage and debridement for osteoarthritis of the knee: an evidence-based analysis. Ontario health technology assessment series 2005;5(12):1-37.			25. Health Quality Ontario. Arthroscopic lavage and debridement for osteoarthritis of the knee: an evidence-based analysis. Ontario health technology assessment series 2005;5(12):1-37.
	26. Reichenbach S et al. Joint lavage for osteoarthritis of the knee. The Cochrane database of systematic reviews 2010.			26. Reichenbach S et al. Joint lavage for osteoarthritis of the knee. The Cochrane database of systematic reviews 2010.
	27. NICE Interventional Procedure Guidance 430. Partial replacement of the meniscus of the knee using a biodegradable scaffold. 2012.			27. NICE Interventional Procedure Guidance 430. Partial replacement of the meniscus of the knee using a biodegradable scaffold. 2012.
	28. NICE Interventional Procedure Guidance 162. Mosaicplasty for knee cartilage defects. 2006.			28. NICE Interventional Procedure Guidance 162. Mosaicplasty for knee cartilage defects. 2006.
	29. NICE Technology Appraisal 89. The use of autologous chondrocyte implantation for the treatment of cartilage defects in knee joints. 2005.			29. NICE Technology Appraisal 89. The use of autologous chondrocyte implantation for the treatment of cartilage defects in knee joints. 2005.
	30. NICE Interventional Procedure Guidance 474. Arthroscopic trochleoplasty for patellar instability.2014.			30. NICE Interventional Procedure Guidance 474. Arthroscopic trochleoplasty for patellar instability.2014.
	31. Knee arthroscopy for chronic knee pain. Cambridgeshire and Peterborough CCG policy approved Sept 2015 http://www.cambsphn.nhs.uk/CCPF/PHPolicies.aspx
	32. Arthroscopic surgery for knee pain; where is the shared decision making? Letter from Dr S Finnikin GP http://www.bmj.com/content/354/bmj.j3934/rr/927387
	33. Osteoarthritis of the knee shared decision-making tool
	34. Orthopaedic groups apologise after claiming that ‘GPs not doing their job properly' http://www.pulsetoday.co.uk/clinical/more-clinical-areas/musculoskeletal/orthopaedic-groups-apologise-after-claiming-that-gps-not-doing-their-job-properly/20010420. full article
	35. NICE Interventional Procedure Guidance 474. Arthroscopic trochleoplasty for patellar instability. 2014. (repeat)
Evidence Development and Standards Branch, Health Quality Ontario . (2014). Arthroscopic Debridement of the Knee: An Evidence Update. Ontario: Ontarioa Health Technology Assessment Series.
Khan M, E. N. (2014). Arthroscopic surgery for degenerative tears of the meniscus: a systematic review and meta-analysis. Canadian Medical Association Journal.
Loof, S. D. (2014). Perioperative complications in smokers and the impact of smoking cessation interventions [Dutch]. Tijdschrift voor Geneeskunde, vol./is. 70/4 (187-192).
NHS Choices. (2015, April 27). NHS Choices. Retrieved from Arthroscopy: http://www.nhs.uk/Conditions/Arthroscopy/Pages/Introduction.aspx
Thelwall, S. (2015). Impact of obesity on the risk of wound infection following surgery: results from a nationwide prospective multicentre cohort study in England. Clinical microbiology and infection : the official publication of the European Society of Clinical Microbiology and Infectious Diseases, vol. 21, no. 11, p. 1008.e1.
